# Supplementary material
Source: Royal Society of Chemistry journal article supplement (doi:10.1039/d6se00145a)
Supplement: d6se00145a1.pdf [file d6se00145a1.pdf]

## Supporting Information

### Boosted Hydrogen Production via Binder-Assisted Immobilization of Hydrogen Boride Sheets on Cathodes

Masaki Imura <sup>a</sup>, Yuta Yamamoto <sup>a</sup>, Yohei Cho <sup>a</sup>, Akira Yamaguchi <sup>a</sup>, Shin-ichi Ito <sup>b</sup>, Yasuyuki Hikita <sup>c</sup>, Takahiro Kondo <sup>\*b, d, e</sup>, and Masahiro Miyauchi <sup>\*a, e</sup>

<sup>a</sup> Department of Materials Science and Engineering, School of Materials and Chemical Technology, Institute of Science Tokyo, Meguro-ku, Tokyo 152-8552, Japan.

<sup>b</sup> Department of Materials Science, Institute of Pure and Applied Sciences, University of Tsukuba, 1-1-1 Tennodai, Tsukuba, Ibaraki 305-8573, Japan.

<sup>c</sup> Advanced Research and Innovation Center, DENSO CORPORATION, Nisshin, Aichi 470-0111, Japan.

<sup>d</sup> The Advanced Institute for Materials Research, Tohoku University, 2-1-1 Katahira, Aoba-ku, Sendai, Miyagi 980-8577 Japan.

<sup>e</sup> Hydrogen Boride Research Center, Tsukuba Institute for Advanced Research (TIAR), University of Tsukuba, 1-1-1 Tennodai, Tsukuba, Ibaraki 305-8573, Japan.

## Contents of Supporting Information

Figure S1. Electron probe microanalyzer (EPMA) spectra of the HB+aramid electrodes with HB/aramid weight ratio of 1/0.25, confirming the presence of boron species on the electrode.

Figure S2. FT-IR spectra of HB-immobilized electrodes.

Table S1. Net mass loss of HB sheets that were peeled from the HB+aramid electrodes.

Figure S3. FT-IR spectra of HB+aramid+graphene electrode before and after the electrolysis, where HB/ aramid/ graphene ratio is 1/ 2/ 1.

Figure S4. An equivalent circuit used for the fitting of (a) the system using the HB+aramid+graphene electrode, (b) the system using the aramid+graphene electrode with dispersed HB sheets and (c) the system using the aramid+graphene electrode without dispersed HB sheets.

Table S2. Impedance of circuit elements.

Table S3. Each parameter of circuit elements obtained from the fittings.

- (a) The system using the HB+aramid+graphene electrode.
- (b) The system using the aramid+graphene electrode and dispersed HB sheets.
- (c) The system using the aramid+graphene electrode without HB sheets.

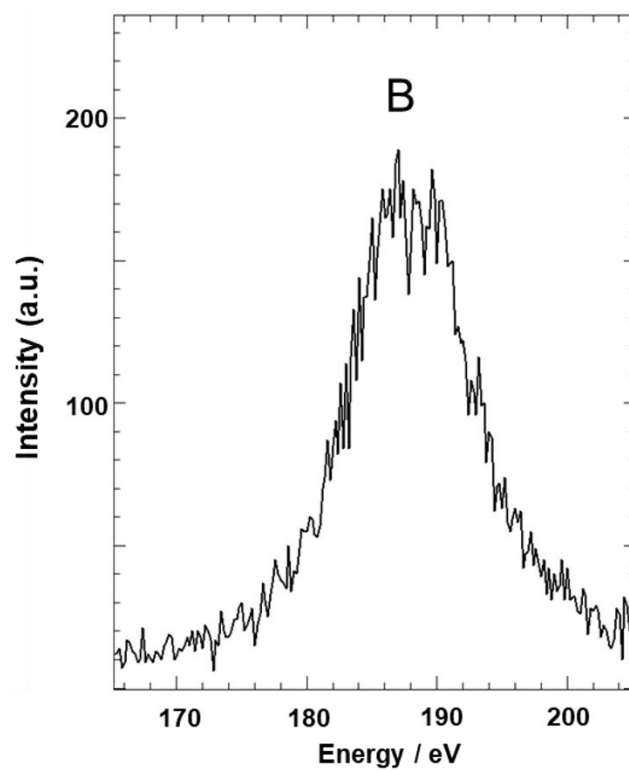

Figure S1. Electron probe microanalyzer (EPMA) spectra of the HB+aramid electrodes with HB/aramid weight ratio of 1/0.25, confirming the presence of boron species on the electrode.

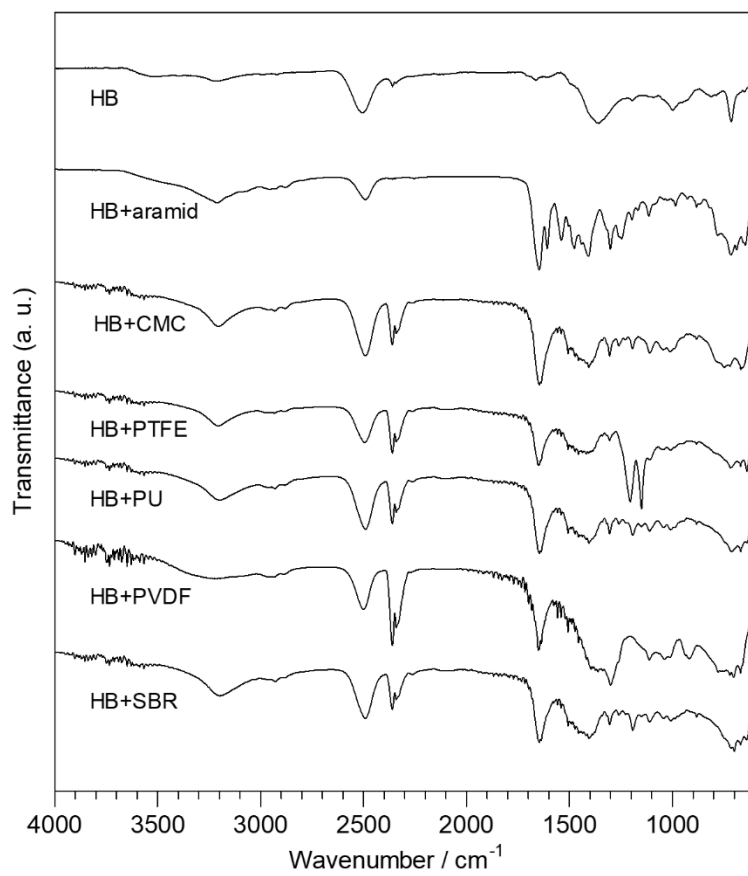

Figure S2. FT-IR spectra of bare HB sheets and HB-immobilized electrodes.

Table S1. Net mass loss of HB sheets that were peeled from the HB+aramid electrodes. The top table shows the mass loss after 5 minutes of soaking. The bottom table shows the mass loss after 5 minutes of electrolysis.

|                               | Aramid/HB ratio<br>(w/w) | HB + binder<br>loss/ mg | Binder<br>loss/ mg | Net HB<br>loss/ mg |
|-------------------------------|--------------------------|-------------------------|--------------------|--------------------|
| Soaking<br>for 5 minutes      | 0.125                    | 2.5                     | 0.0                | 2.5                |
|                               | 0.25                     | 1.6                     | 0.0                | 1.6                |
|                               | 0.5                      | 1.4                     | 0.1                | 1.3                |
|                               | 1                        | 1.4                     | 0.1                | 1.3                |
|                               | 2                        | 1.0                     | 0.3                | 0.7                |
|                               | 5                        | 0.8                     | 0.3                | 0.5                |
| Electrolysis<br>for 5 minutes | 0.125                    | 2.6                     | 0.0                | 2.6                |
|                               | 0.25                     | 1.8                     | 0.1                | 1.7                |
|                               | 0.5                      | 1.3                     | 0.0                | 1.3                |
|                               | 1                        | 1.4                     | 0.1                | 1.3                |
|                               | 2                        | 1.0                     | 0.3                | 0.7                |
|                               | 5                        | 0.7                     | 0.3                | 0.4                |

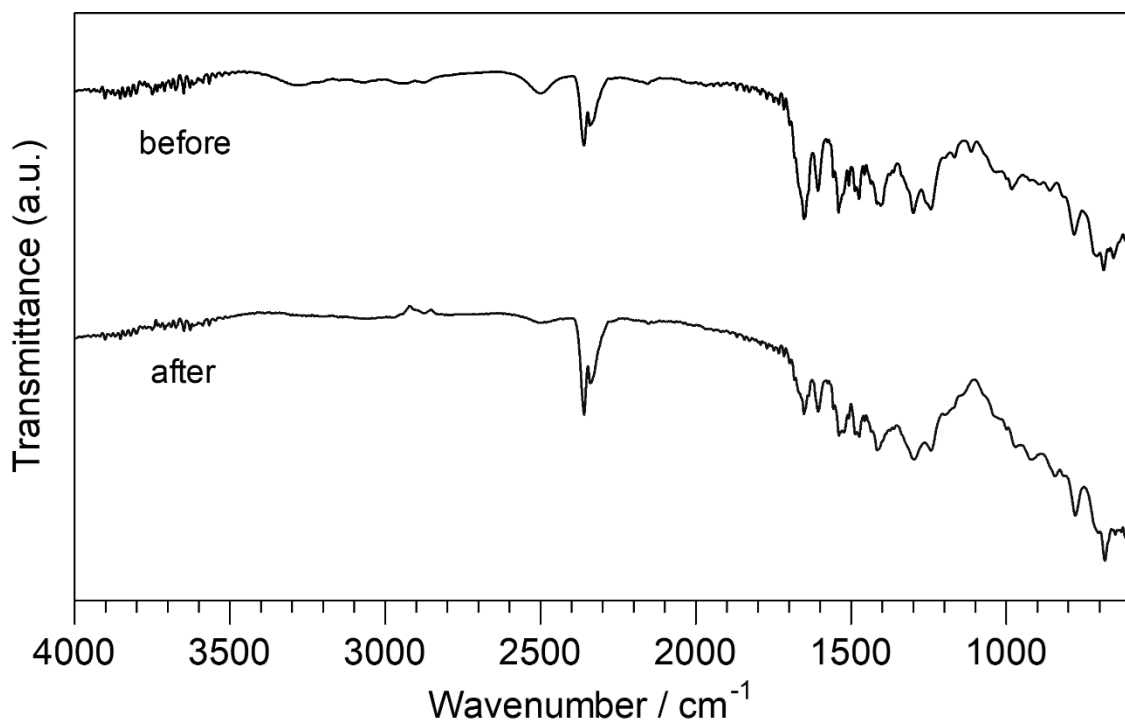

Figure S3. FT-IR spectra of the HB+aramid+graphene electrode before and after the electrolysis, where HB/aramid/graphene ratio is 1/2/1. The signal of B-H bond (2500 cm<sup>-1</sup>) was reduced after the electrolytic hydrogen production.

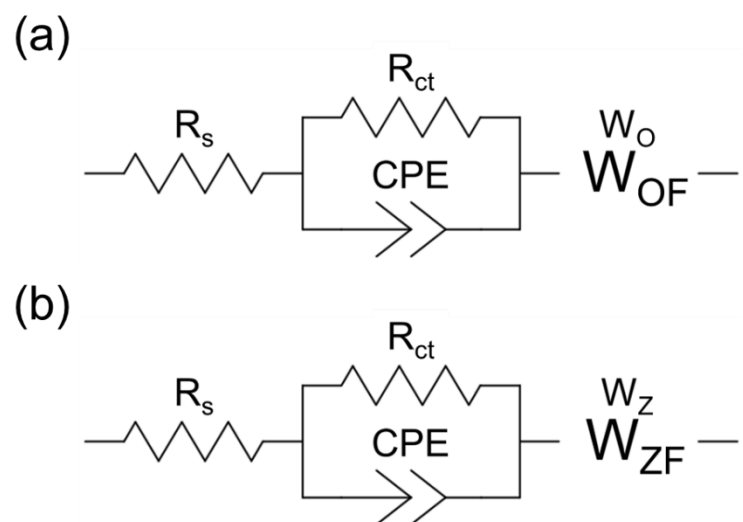

Figure S4. Equivalent circuits used for the fitting of (a) the system using HB+aramid+graphene electrode, (b) the system using dispersed HB sheets and without them.

Table S2. Impedance of circuit elements.

| Name                            | Symbol   | Impedance ( $\Omega$ )                             |
|---------------------------------|----------|----------------------------------------------------|
| Solution resistance             | $R_s$    | $Z = R_s$                                          |
| Charge transfer resistance      | $R_{ct}$ | $Z = R_{ct}$                                       |
| Constant phase element          | CPE      | $Z = \frac{1}{T(j\omega)^p}$                       |
| Warburg element (semi-infinite) | $W_z$    | $Z = \frac{(1-j)\sigma}{\sqrt{\omega}}$            |
| Warburg element (open)          | $W_o$    | $Z = R_N \frac{\coth(j\omega T)^p}{(j\omega T)^p}$ |

Table S3. Each parameter of circuit elements obtained from the fittings.

(a) The system using the HB+aramid+graphene electrode.

| Circuit element | Parameters                                                                 |
|-----------------|----------------------------------------------------------------------------|
| $R_s$           | $R_s = 37.8 \Omega$                                                        |
| $R_{ct}$        | $R_{ct} = 65.8 \Omega$                                                     |
| CPE             | $p = 0.661$<br>$T = 2.16 \times 10^{-4} \text{ F s}^{-0.339}$              |
| $W_O$           | $R_N = 0.840 \Omega$<br>$p = 0.331$<br>$T = 1.17 \times 10^{-3} \text{ s}$ |

(b) The system using the aramid+graphene electrode with dispersed HB sheets.

| Circuit element | Parameters                                                    |
|-----------------|---------------------------------------------------------------|
| $R_s$           | $R_s = 42.1 \Omega$                                           |
| $R_{ct}$        | $R_{ct} = 5.20 \times 10^2 \Omega$                            |
| CPE             | $p = 0.737$<br>$T = 5.36 \times 10^{-5} \text{ F s}^{-0.263}$ |
| $W_Z$           | $\sigma = 4.32 \times 10^2 \Omega \text{ s}^{-1/2}$           |

(c) The system using the aramid+graphene electrode without dispersed HB sheets.

| Circuit element | Parameters                                                    |
|-----------------|---------------------------------------------------------------|
| $R_s$           | $R_s = 38.9 \Omega$                                           |
| $R_{ct}$        | $R_{ct} = 7.05 \times 10^2 \Omega$                            |
| CPE             | $p = 0.746$<br>$T = 6.94 \times 10^{-5} \text{ F s}^{-0.254}$ |
| $W_Z$           | $\sigma = 3.87 \times 10^2 \Omega \text{ s}^{-1/2}$           |
